# Supplementary material
Source: publisher figshare collection journal article supplement (https://acs.figshare.com/ndownloader/files/7719418)
Supplement: Supplementary file 1 [file 7719418]

# Supporting Information

## Inhibition and Stabilization: Cucurbituril Induced Distinct Effects on the Schiff Base Reaction

Wanjun Gong, Jun Ma, Zhiyong Zhao, Fang Gao, Feng Liang, Haijun Zhang, Simin Liu\*

The State Key Laboratory of Refractories and Metallurgy, School of Chemistry and Chemical Engineering, Wuhan University of Science and Technology, Wuhan 430081, China

| Table of Contents                                                                     | Page    |
|---------------------------------------------------------------------------------------|---------|
| Table of Contents                                                                     | S1      |
| Partial $^1\text{H}$ NMR spectra of <b>1</b> , <b>2</b> with/without CB[7] in pD 13.6 | S2      |
| Plot of imine percentage at different pD                                              | S2      |
| Binding constants for <b>1</b> and <b>2</b> with CB[7]                                | S3      |
| Determination of $\text{p}K_{\text{a}}$ shift of <b>2</b> with/without CB[7]          | S3      |
| Partial $^1\text{H}$ NMR spectra for the hydrolysis of imine                          | S4      |
| The CIS values for cations in the absence/presence of CB[7]                           | S5      |
| Volumes of iminium cations and PCs calculation                                        | S5      |
| Partial $^1\text{H}$ NMR spectra of iminium cations with/without CB[7]                | S6-S7   |
| Lifetime of iminium cations with/without CB[7]                                        | S8      |
| Side view of crystal structure of CB[7]• <b>7</b>                                     | S9      |
| Partial $^1\text{H}$ NMR spectra of iminium cations with/without CB[6]                | S10-S11 |
| Lifetime of iminium cations with/without CB[6]                                        | S12     |
| Crystal structure of CB[7]• <b>7</b> with thermal ellipsoid plot                      | S13     |

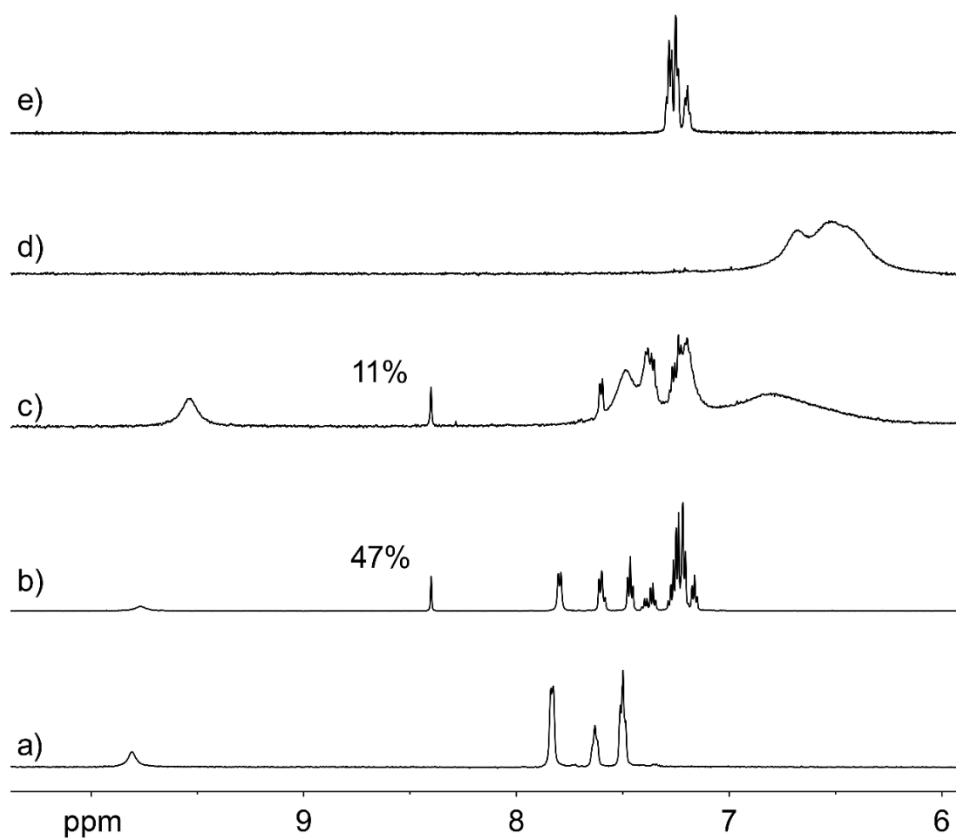

**Figure S1.** Partial  $^1\text{H}$  NMR spectra (600 MHz, pD = 13.6) for a) **1** (2.0 mM); b) 1h after adding **1** (2.0 mM) to **2** (2.0 mM); c) 1h after adding **1** (2.0 mM) to a 1:1.1 mixture of **2** (2.0 mM) and CB[7]; d) 1:1.1 mixture of **2** (2.0 mM) and CB[7]; e) **2** (2.0 mM).

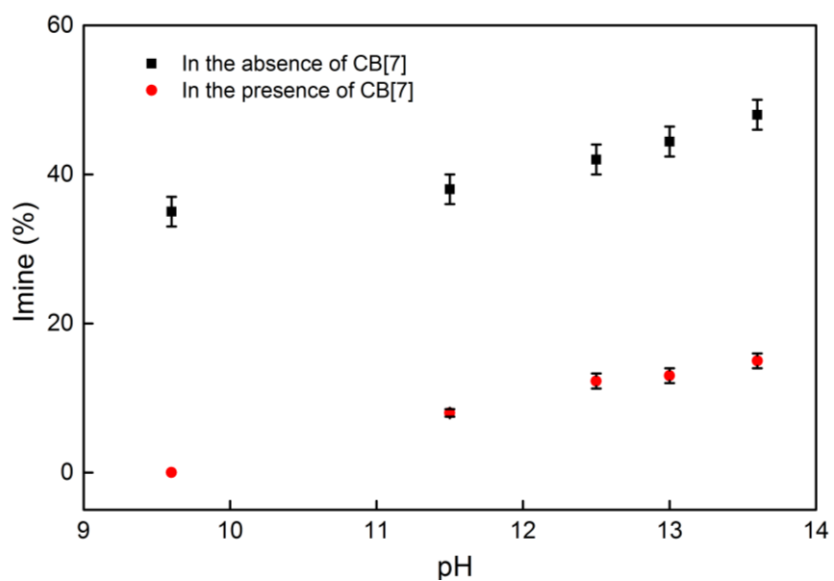

**Figure S2.** Plot of imine percentage at different pD for the condensation reaction of **1** and **2**.

**Table S1.** Values of  $K_a$  [ $M^{-1}$ ] measured by UV-Vis titration for the binding of **1** and **2** with CB[7] at different pH.

| Guest    | pH = 9.6                    | pH = 13.6                   |
|----------|-----------------------------|-----------------------------|
| <b>1</b> | $(6.5 \pm 0.5) \times 10^2$ | $(4.3 \pm 0.3) \times 10^2$ |
| <b>2</b> | $(1.7 \pm 0.3) \times 10^4$ | $(1.2 \pm 0.1) \times 10^3$ |

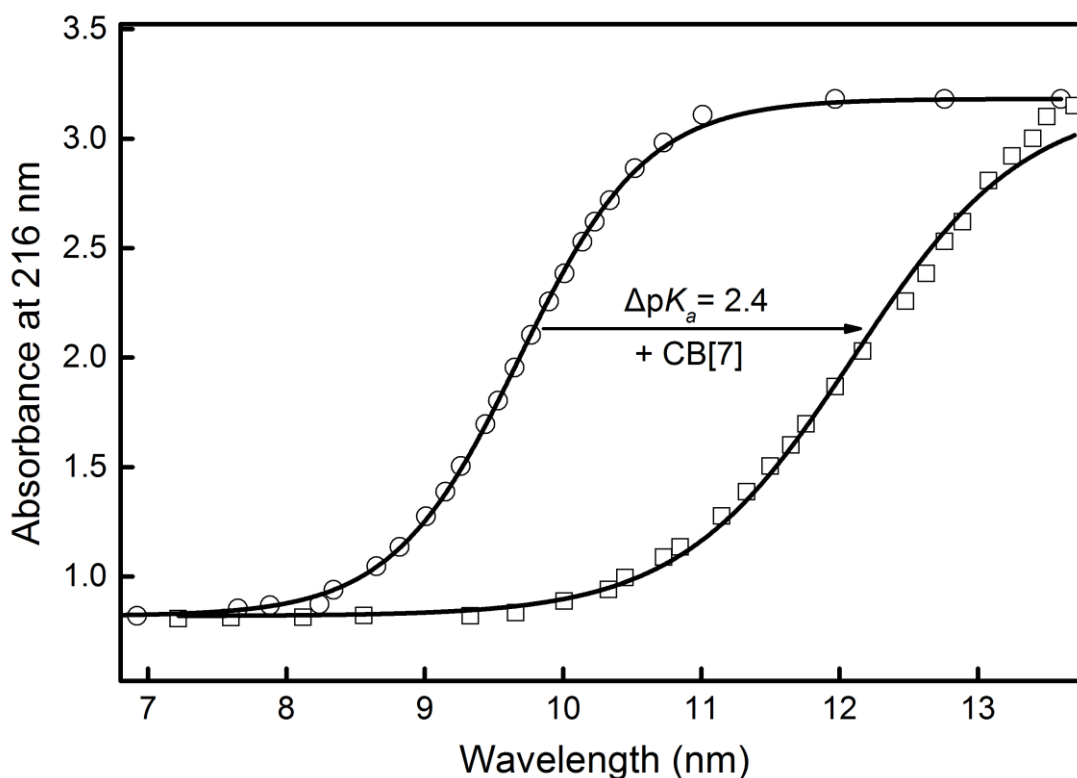

**Figure S3.** pH titration of **2** (1.0 mM) in the absence of CB[7] (circle) and in the presence of 5.0 mM CB[7] (square). And the  $pK_a$  values were determined according to the equation (3).

$$A = \frac{A1 - A2}{1 + \exp\left[\frac{pH - pK_a}{n}\right]} + A2 \quad (3)$$

Where “n” denotes a fitting parameter,  $pK_a$  represents the negative logarithm of the equilibrium constant  $K_a = [2][H^+]/[2H^+]$ , A1 and A2 are the absorbances at low and high pH, respectively. The non-linear-squares fit of equation (3) to the experimental dates gives  $pK_a = 9.68 \pm 0.01$  for **2** in the absence of CB[7] and  $pK_a = 12.10 \pm 0.02$  for **2** in the presence of CB[7].

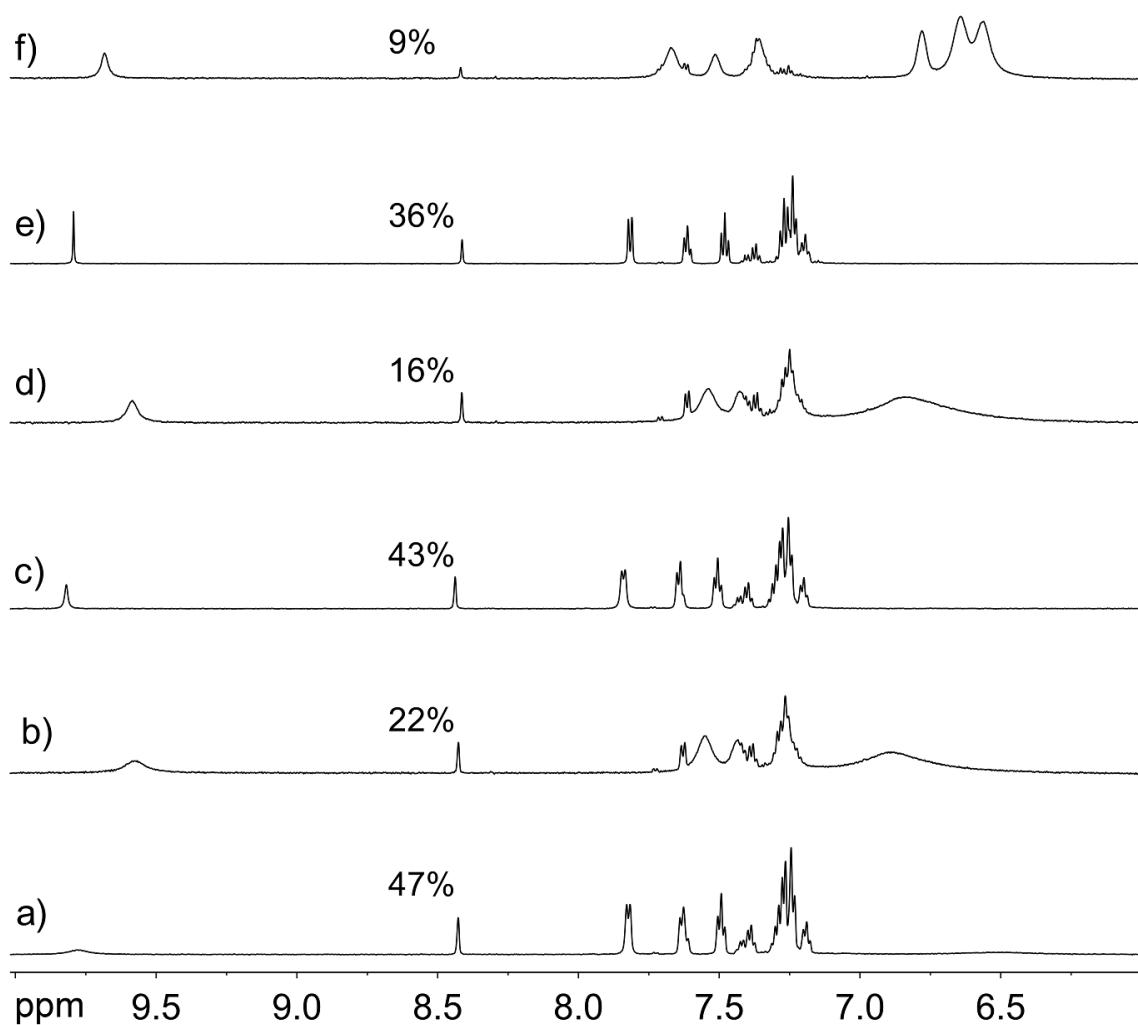

**Figure S4.** Partial  $^1\text{H}$  NMR spectra (600 MHz,  $\text{D}_2\text{O}$ ) for the hydrolysis of imine with (b, d, f) and without (a, c, e) CB[7] in pD = 13.6 (a, b), pD = 12.5 (c, d) and pD = 11.5 (e, f). Percentage of imine was calculated until there was no any change on  $^1\text{H}$  NMR spectra.

**Table S2.** The CIS values for cations in the absence/presence of CB[7].

| Guest    | N–C–H ( $\alpha$ moiety) |            |       | N=C–C–H ( $\beta$ moiety) |            |       |
|----------|--------------------------|------------|-------|---------------------------|------------|-------|
|          | Free                     | With CB[7] | CIS   | Free                      | With CB[7] | CIS   |
| <b>3</b> | 3.94                     | 3.12       | -0.82 | 2.17                      | 1.96       | -0.21 |
| <b>4</b> | 3.88                     | 3.46       | -0.42 | 2.82                      | 2.14       | -0.68 |
| <b>5</b> | 3.99                     | 3.82       | -0.17 | 2.79                      | 1.87       | -0.92 |
| <b>6</b> | 3.97                     | 3.90       | -0.07 | 2.91                      | 2.06       | -0.85 |
| <b>7</b> | 3.99                     | 3.97       | -0.02 | 3.23                      | 2.44       | -0.79 |

**Table S3.** Volumes of iminium cations and PCs.

|          | $\beta$ moiety                                                                      |                | $\alpha$ moiety                    | Volume for $\beta$ moiety ( $\text{\AA}^3$ ) | PCs   |
|----------|-------------------------------------------------------------------------------------|----------------|------------------------------------|----------------------------------------------|-------|
|          | R <sub>1</sub>                                                                      | R <sub>2</sub> |                                    |                                              |       |
| <b>3</b> | Me                                                                                  | Me             |                                    | 62                                           | 22.22 |
| <b>4</b> | —(CH <sub>2</sub> ) <sub>4</sub> —                                                  |                |                                    | 86                                           | 30.82 |
| <b>5</b> | —(CH <sub>2</sub> ) <sub>5</sub> —                                                  |                |                                    | 102                                          | 36.55 |
| <b>6</b> | —(CH <sub>2</sub> ) <sub>6</sub> —                                                  |                | —(CH <sub>2</sub> ) <sub>4</sub> — | 118                                          | 42.29 |
| <b>7</b> | 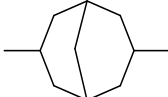 |                |                                    | 147                                          | 52.68 |

The volumes were calculated by geometry optimization with AM1 semiempirical method for the corresponding alkane and the PCs were calculated based on the CB[7] inner cavity volume which is reported as 279  $\text{\AA}^3$ .<sup>1</sup>

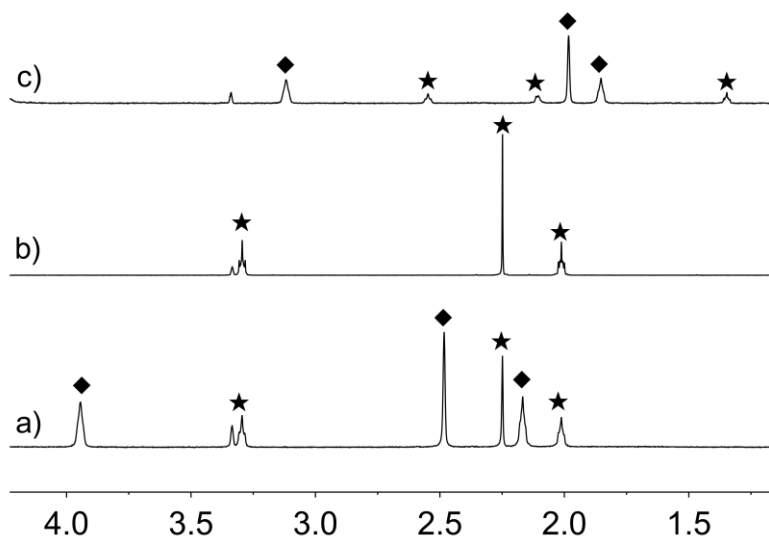

**Figure S5.** Partial  $^1\text{H}$  NMR spectra (600 MHz,  $\text{D}_2\text{O}$ ) for a) **3**; b) hydrolyzed **3**; c) **3** in the presence of CB[7] (1.0 eq).  $\blacklozenge$  stands for **3** and  $\star$  stands for the corresponding ketone and amine.

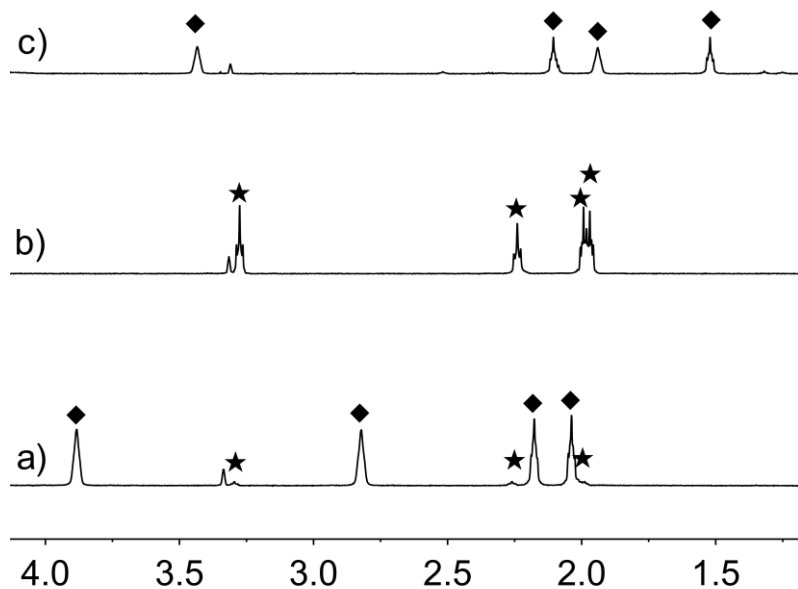

**Figure S6.** Partial  $^1\text{H}$  NMR spectra (600 MHz,  $\text{D}_2\text{O}$ ) for a) **4**; b) hydrolyzed **4**; c) **4** in the presence of CB[7] (1.0 eq).  $\blacklozenge$  stands for **4** and  $\star$  stands for the corresponding ketone and amine.

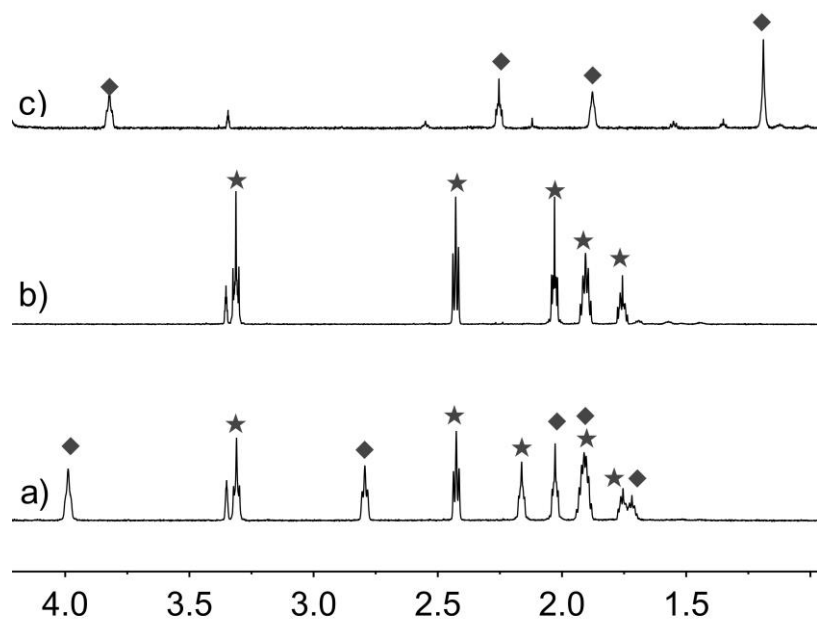

**Figure S7.** Partial  $^1\text{H}$  NMR spectra (600 MHz,  $\text{D}_2\text{O}$ ) for a) **5**; b) hydrolyzed **5**; c) **5** in the presence of CB[7] (1.0 eq).  $\blacklozenge$  stands for **5** and  $\star$  stands for the corresponding ketone and amine.

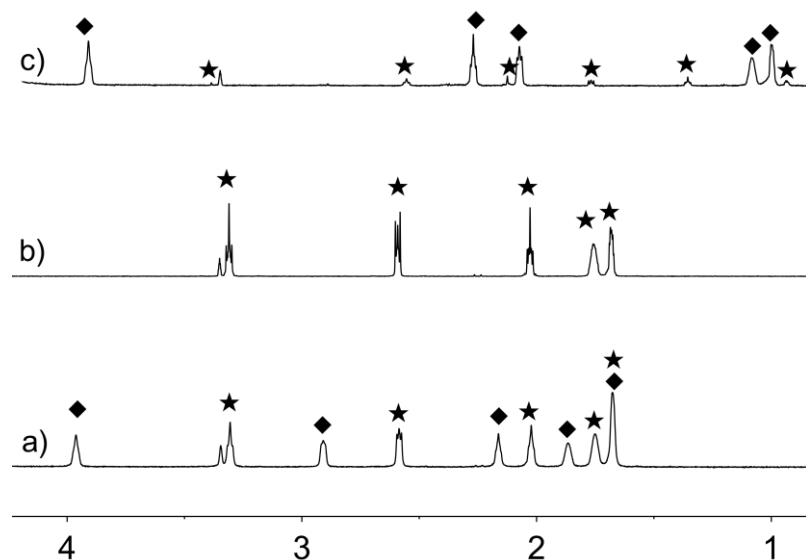

**Figure S8.** Partial  $^1\text{H}$  NMR spectra (600 MHz,  $\text{D}_2\text{O}$ ) for a) **6**; b) hydrolyzed **6**; c) **6** in the presence of CB[7] (1.0 eq).  $\blacklozenge$  stands for **6** and  $\star$  stands for the corresponding ketone and amine.

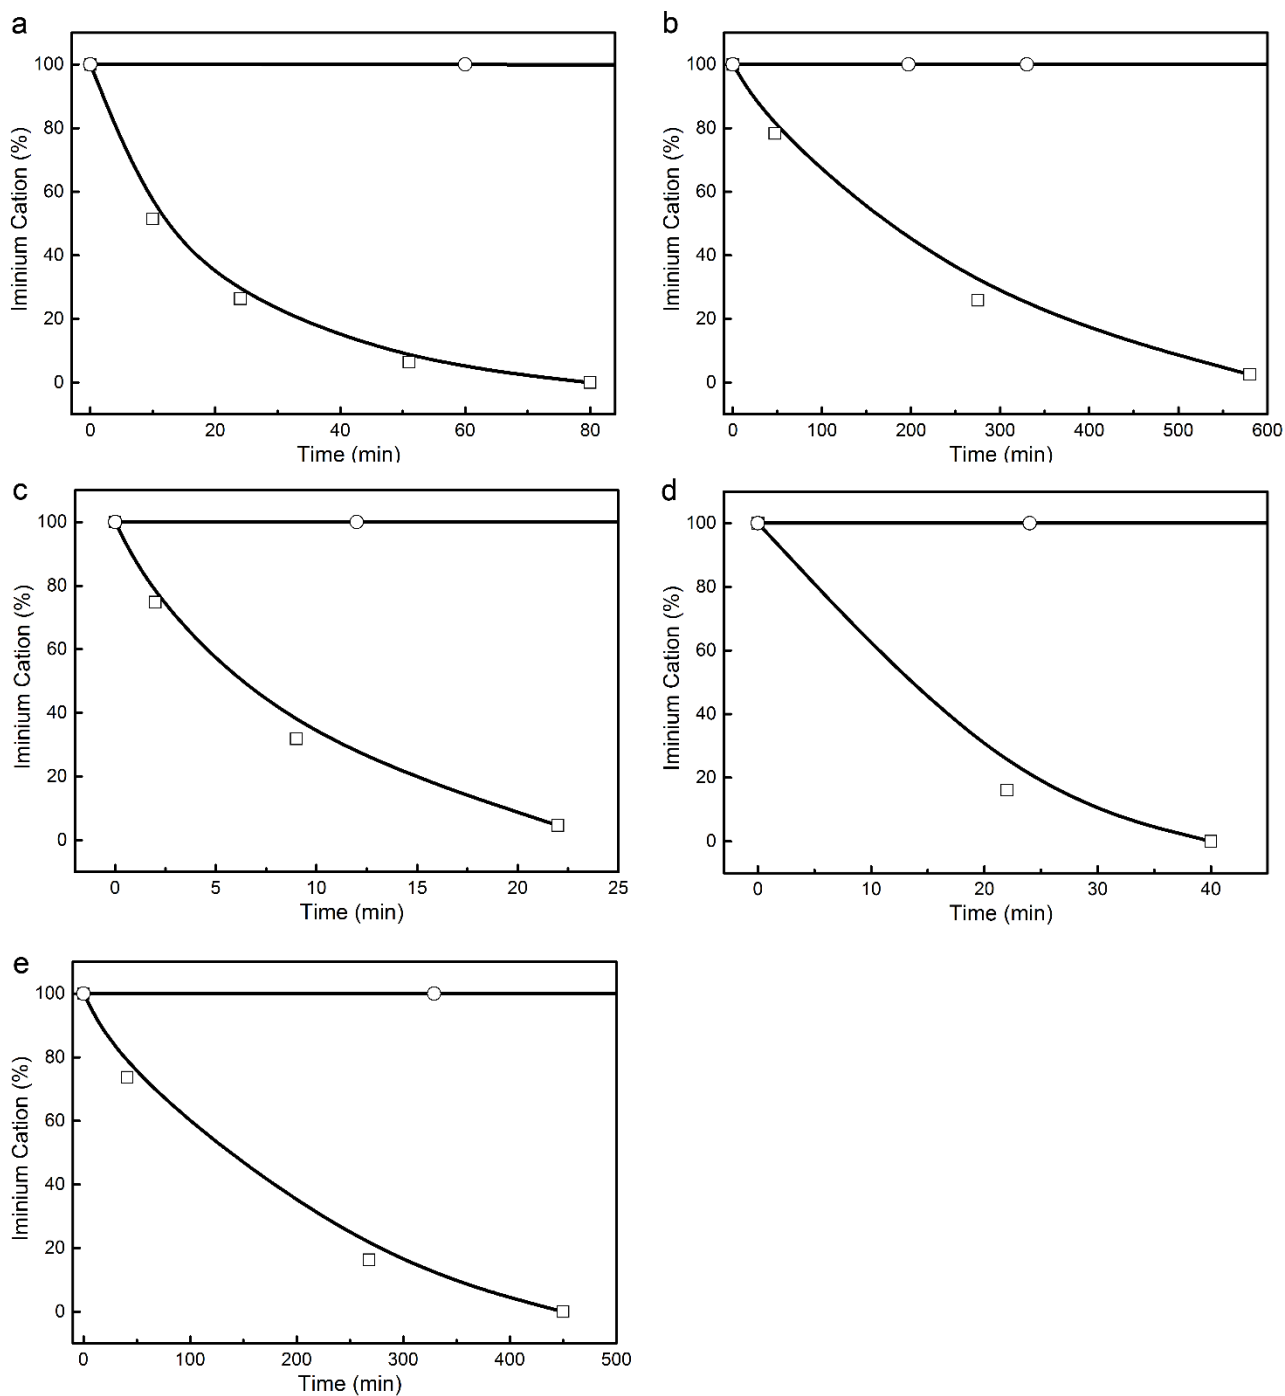

**Figure S9.** Lifetime of a) **3**; b) **4**; c) **5**; d) **6** and e) **7** in the absence of CB[7] (square) and in the presence of CB[7] (circle).



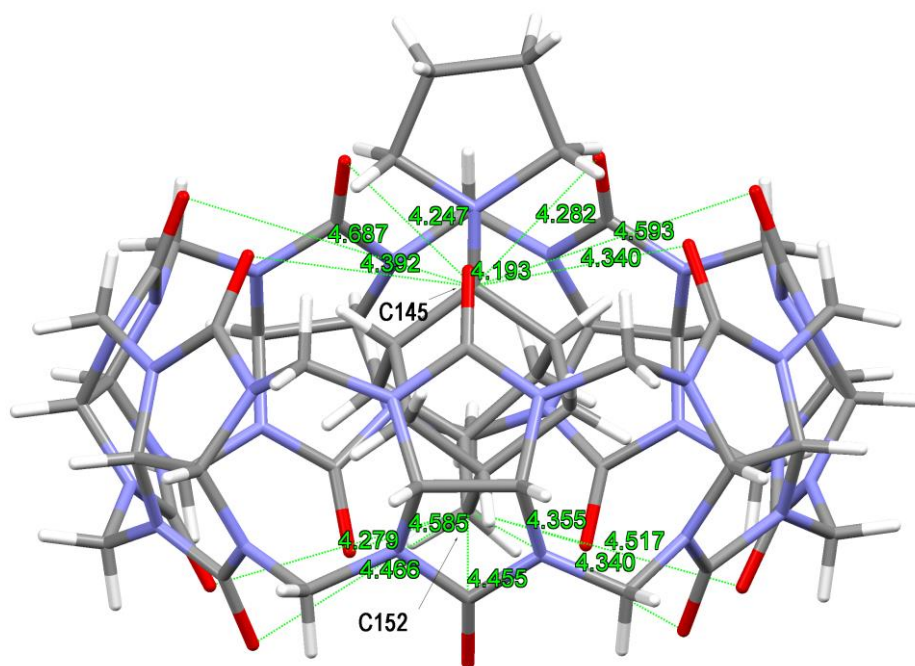

**Figure S10.** Side view of the crystal structure of CB[7]•7 showing that the average distances from C145 and C152 to the adjacent oxygens on CB[7] are quite similar.

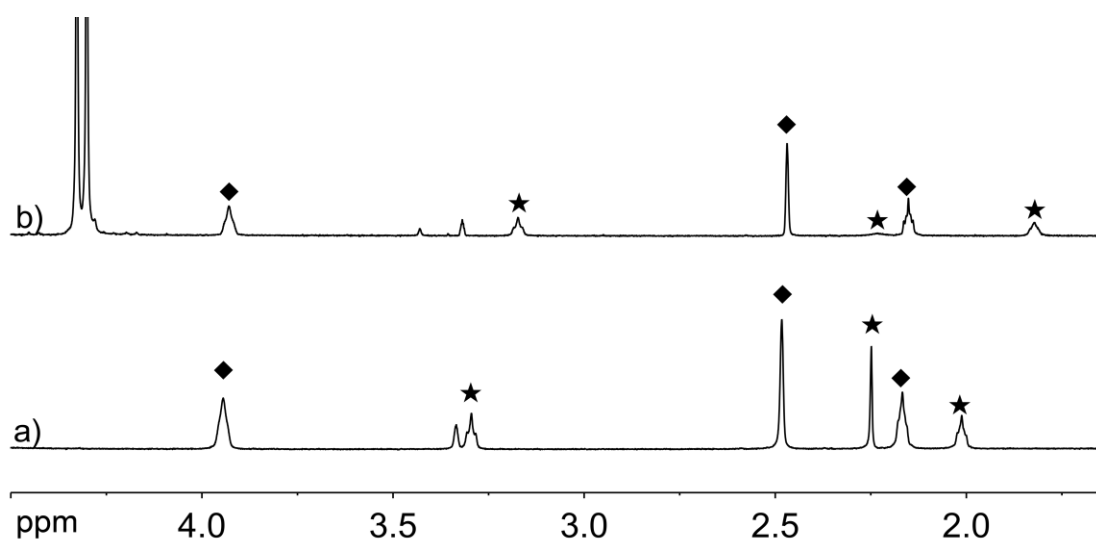

**Figure S11.** Partial  $^1\text{H}$  NMR spectra (600 MHz,  $\text{D}_2\text{O}$ ) for a) **3**; b) **3** in the presence of CB[6] (1.0 eq). ♦ stands for **3** and ★ stands for the corresponding ketone and amine.

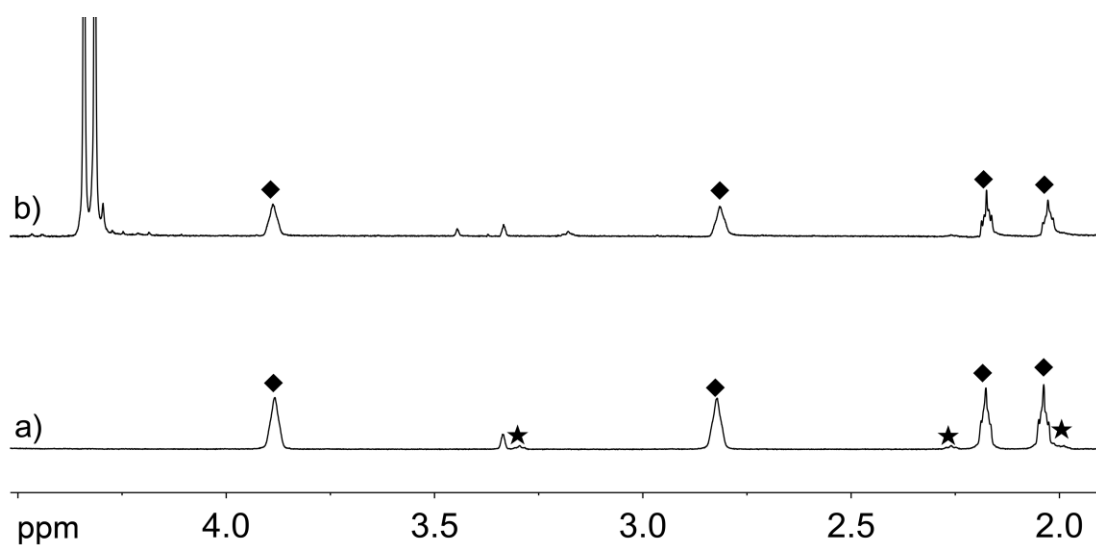

**Figure S12.** Partial  $^1\text{H}$  NMR spectra (600 MHz,  $\text{D}_2\text{O}$ ) for a) **4**; b) **4** in the presence of CB[6] (1.0 eq). ♦ stands for **4** and ★ stands for the corresponding ketone and amine.

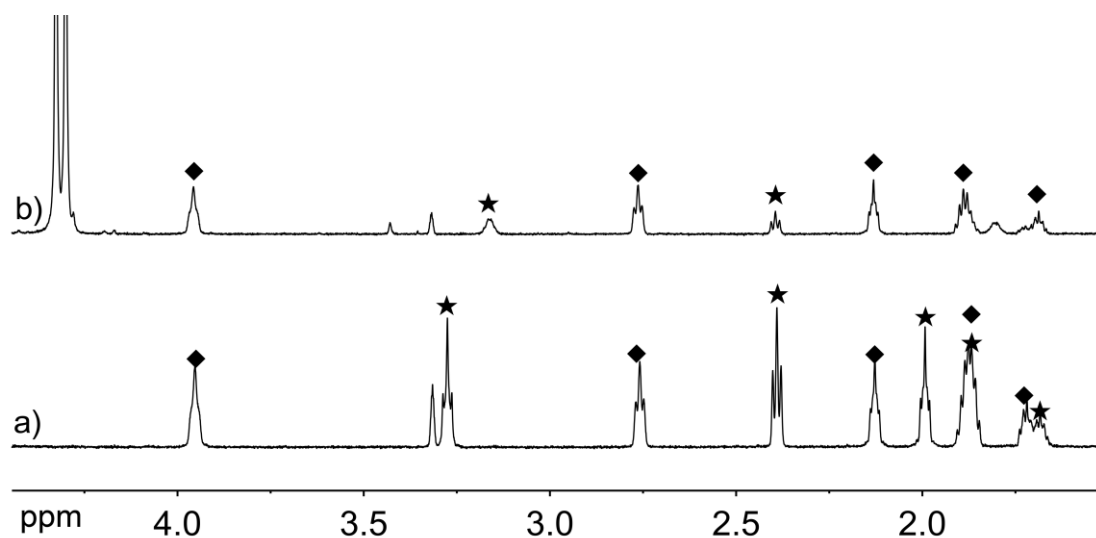

**Figure S13.** Partial  $^1\text{H}$  NMR spectra (600 MHz,  $\text{D}_2\text{O}$ ) for a) **5**; b) **5** in the presence of CB[6] (1.0 eq). ♦ stands for **5** and ★ stands for the corresponding ketone and amine.

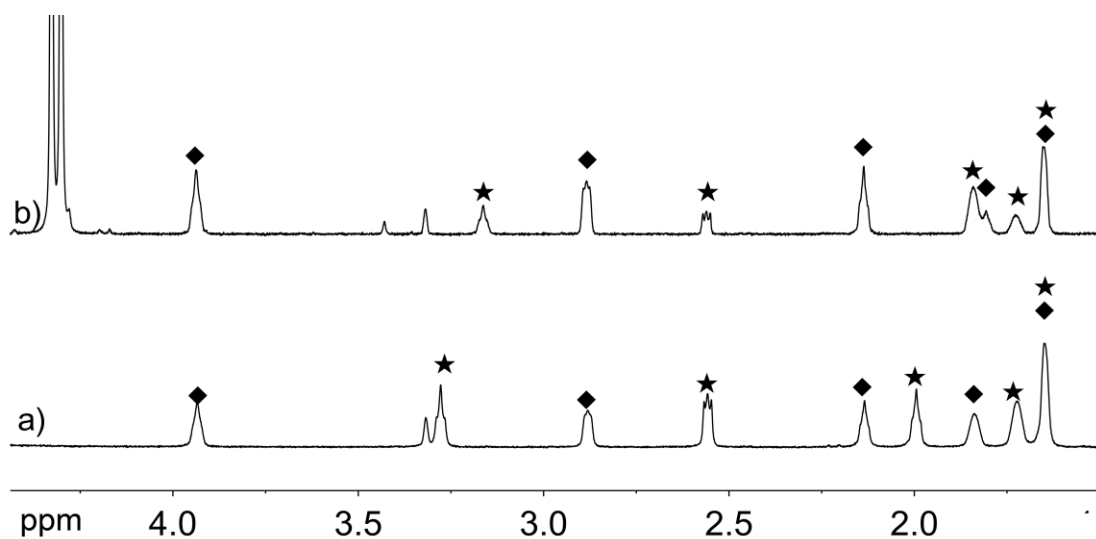

**Figure S14.** Partial  $^1\text{H}$  NMR spectra (600 MHz,  $\text{D}_2\text{O}$ ) for a) **6**; b) **6** in the presence of CB[6] (1.0 eq). ♦ stands for **6** and ★ stands for the corresponding ketone and amine.

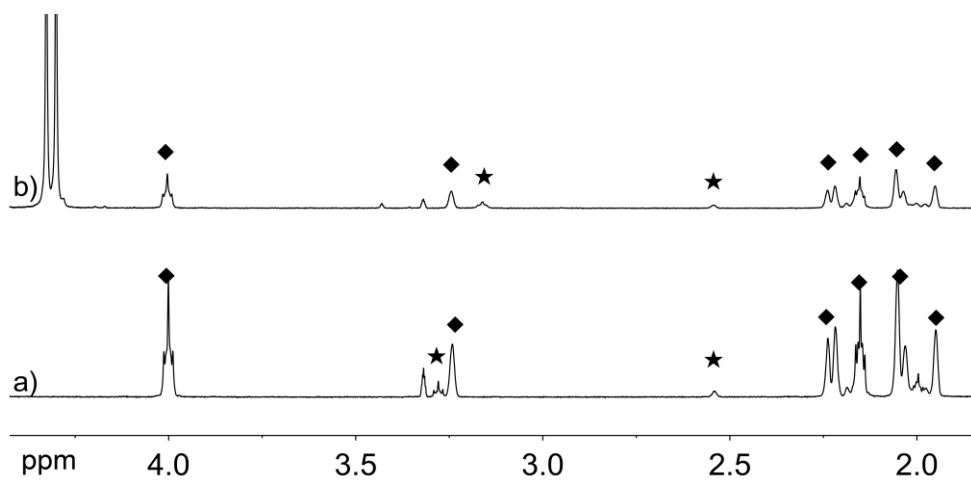

**Figure S15.** Partial  $^1\text{H}$  NMR spectra (600 MHz,  $\text{D}_2\text{O}$ ) for a) **7**; b) **7** in the presence of CB[6] (1.0 eq). ♦ stands for **7** and ★ stands for the corresponding ketone and amine.

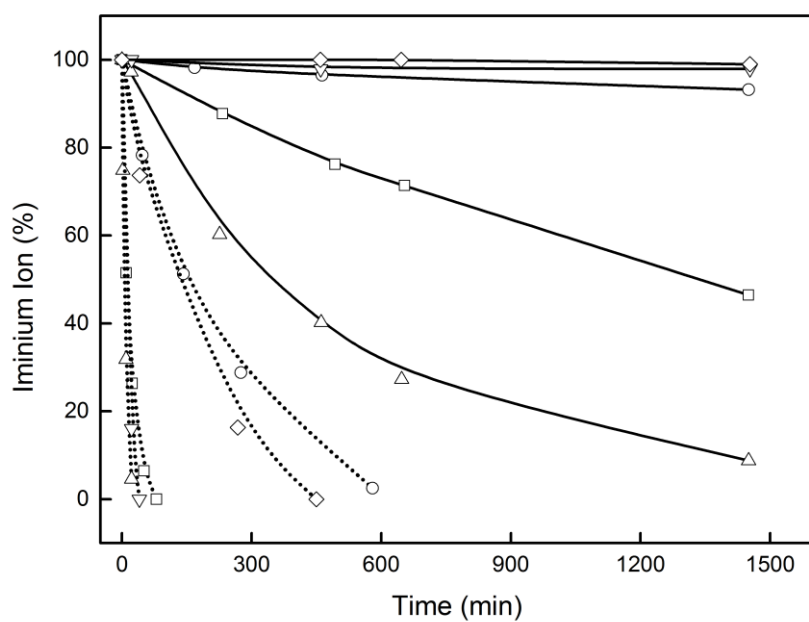

**Figure S16.** Lifetime of iminium cations (□ for **3**; ○ for **4**; △ for **5**; ▽ for **6**; ◇ for **7**) in the absence (dotted line) and presence (solid line) of CB[6] (1.0 eq).

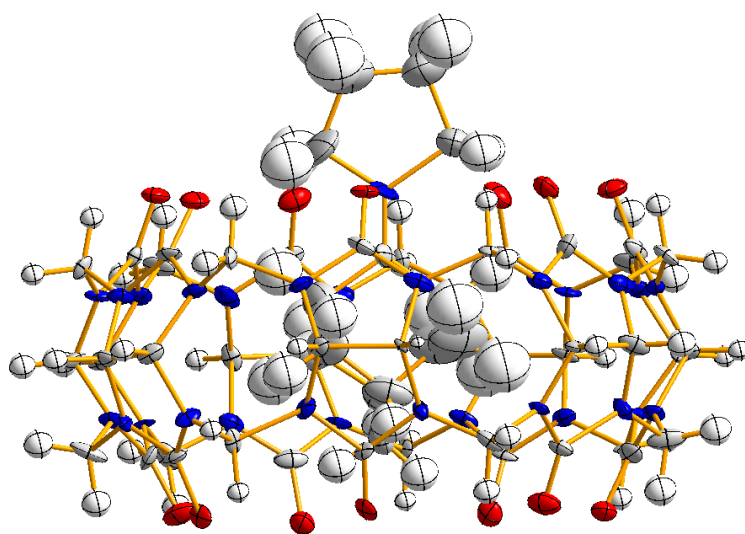

**Figure S17.** Crystal structure of CB[7]•7 with thermal ellipsoid plot (50% probability ellipsoids).

(1) Nau, W. M.; Florea, M.; Assaf, K. I. *Isr. J. Chem.* **2011**, 51, 559-577.
